# Supplementary material for: Somatostatin-expressing parafacial neurons are CO2/H+ sensitive and regulate baseline breathing
Source: eLife. 2021 May 20;10:e60317. doi: 10.7554/eLife.60317 (PMC8169115; doi:10.7554/eLife.60317)
Supplement: Figure 1—figure supplement 2—source data 1. [file elife-60317-fig1-figsupp2-data1.xlsx]

## Sheet: Sheet1
Source Data Figure 1-figure supplement 2: Cell Cout Caudal to Rostral
Location From Nucleus Ambiguus (um)	Mouse 1	Mouse 2	Mouse 3	Mouse 4	AVERAGE	SEM
0	30	32	32	30	31	0.57735
30	52	38	25	41	39	5.55278
60	55	50	43	48	49	2.48328
90	47	13	32	23	29	7.21543
120	42	46	44	21	39	5.80768
150	15	43	25	11	24	7.13559
180	24	40	17	8	23	6.76233
210	26	34	10	8	20	6.29153
240	26	19	17	8	18	3.7081
270	17	20	6	8	13	3.40037
300	19	21	16	19	19	1.03078
330	22	16	49	15	26	7.98436
360	25	9	8	19	16	4.09013
390	19	18	28	43	27	5.78792
420	16	19	40	77	38	14.0535
450	9	9	8	10	9	0.408248
480	28	29	27	32	29	1.08012
510	9	11	10	14	11	1.08012
540	17	19	22	18	19	1.08012
