# Supplementary material for: Somatostatin-expressing parafacial neurons are CO2/H+ sensitive and regulate baseline breathing
Source: eLife. 2021 May 20;10:e60317. doi: 10.7554/eLife.60317 (PMC8169115; doi:10.7554/eLife.60317)
Supplement: Figure 2—source data 1. [file elife-60317-fig2-data1.xlsx]

## Sheet: Sheet1
Source Data: Figure 2
	VGATCre::TdT Neuron Response to 10% CO2 (in Hz)
	Inhibited	Insensitive	Activated
	-7.22087	-0.713	1.14704
	-6.46745	-0.705	1.14875
	-6.1183	-0.69982	1.17456
	-4.80382	-0.65872	1.49864
	-4.42408	-0.61199	1.52146
	-3.52353	-0.58515	2.19109
	-3.00037	-0.49302	2.94173
	-2.877	-0.47701	2.95905
	-2.80783	-0.46323	4.50615
	-2.63594	-0.44847
	-2.60817	-0.44832
	-2.582	-0.44252
	-2.24417	-0.43701
	-2.242	-0.41226
	-2.17995	-0.38622
	-2.13627	-0.36442
	-2.123	-0.34242
	-2.0742	-0.2853
	-1.98641	-0.28438
	-1.87156	-0.26502
	-1.82675	-0.24891
	-1.8	-0.23806
	-1.76466	-0.17355
	-1.71196	-0.14045
	-1.65245	-0.09632
	-1.55224	-0.09199
	-1.52195	-0.06672
	-1.4732	-0.0569
	-1.43799	-0.04574
	-1.43497	-0.011
	-1.40187	-0.00579
	-1.38413	0
	-1.38136	0.003319
	-1.37172	0.01
	-1.35111	0.036934
	-1.317	0.05
	-1.30295	0.055318
	-1.285	0.061324
	-1.25634	0.067496
	-1.19514	0.071
	-1.15391	0.072027
	-1.12741	0.094948
	-1.11951	0.095893
	-1.11533	0.1196
	-1.112	0.126182
	-1.0863	0.140861
	-1.08025	0.142894
	-0.99133	0.22
		0.245887
		0.255701
		0.26959
		0.312265
		0.377067
		0.407593
		0.423132
		0.438933
		0.441387
		-0.89
		-0.87811
		-0.8671
		-0.85961
		-0.84075
		-0.84075
		-0.83586
		-0.82812
		-0.81466
		0.476829
		0.509
		0.5456
		0.583499
		0.644589
		0.699861
		0.711038
Total N	48	73	9
