# Supplementary figures and images for: Somatostatin-expressing parafacial neurons are CO2/H+ sensitive and regulate baseline breathing
Source: eLife journal article supplement (doi:10.7554/elife.60317), 2021-05-20

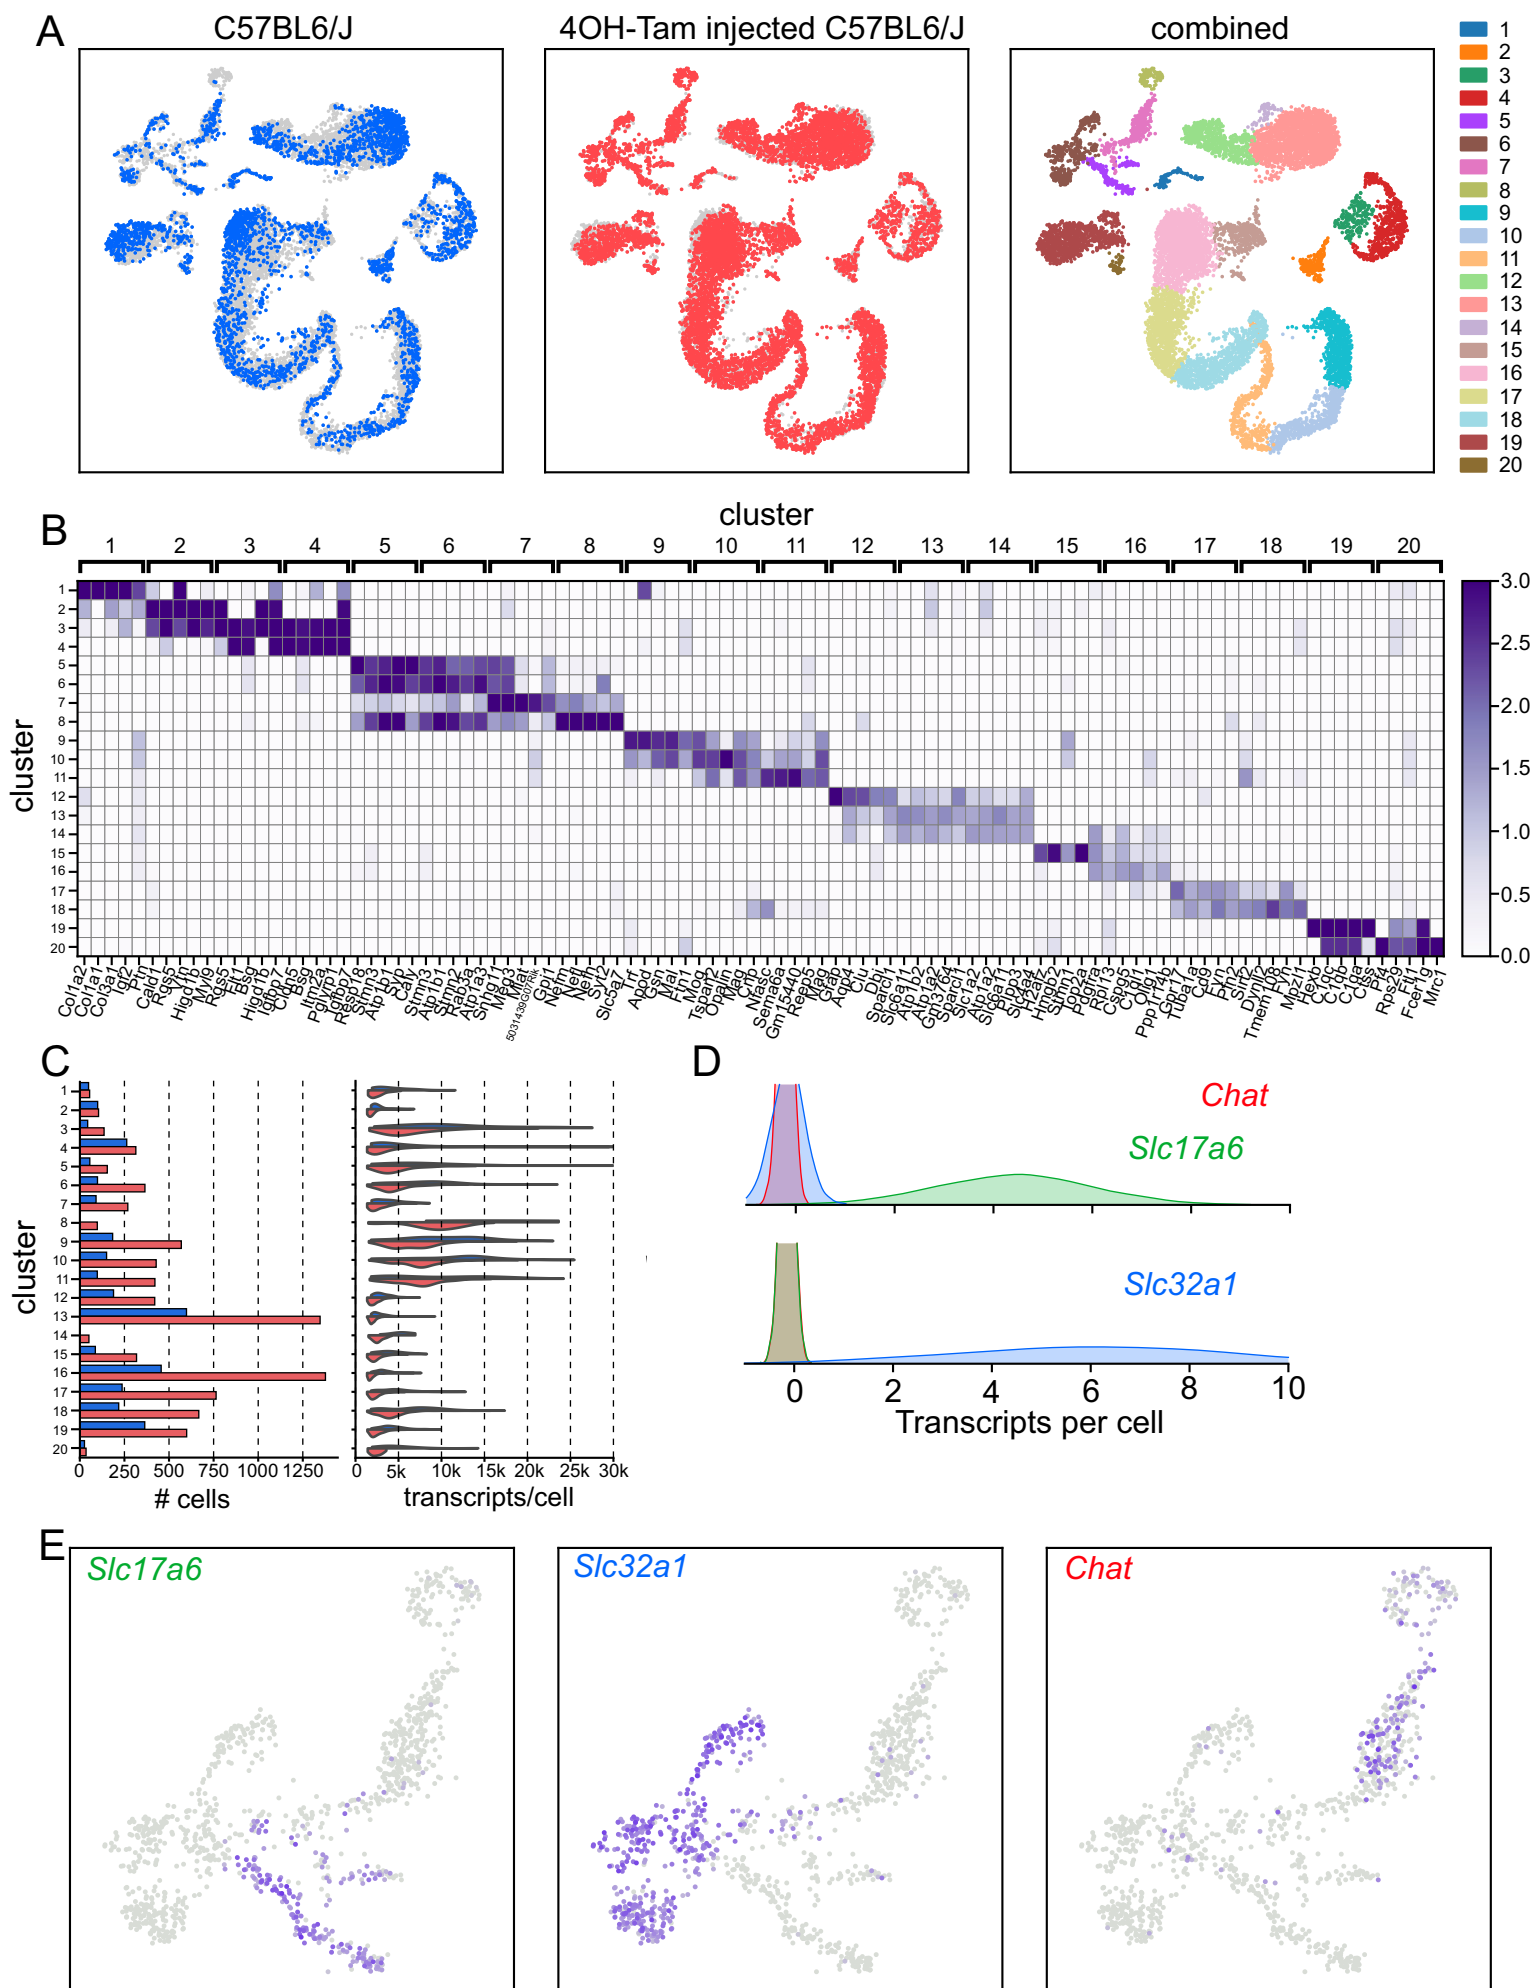

Figure 1- figure supplement 1

Supplement: supp [file elife_poa_e60317_Figure_1_figure_supplement_1.pdf › elife_poa_e60317_Figure_1_figure_supplement_1.pdf]

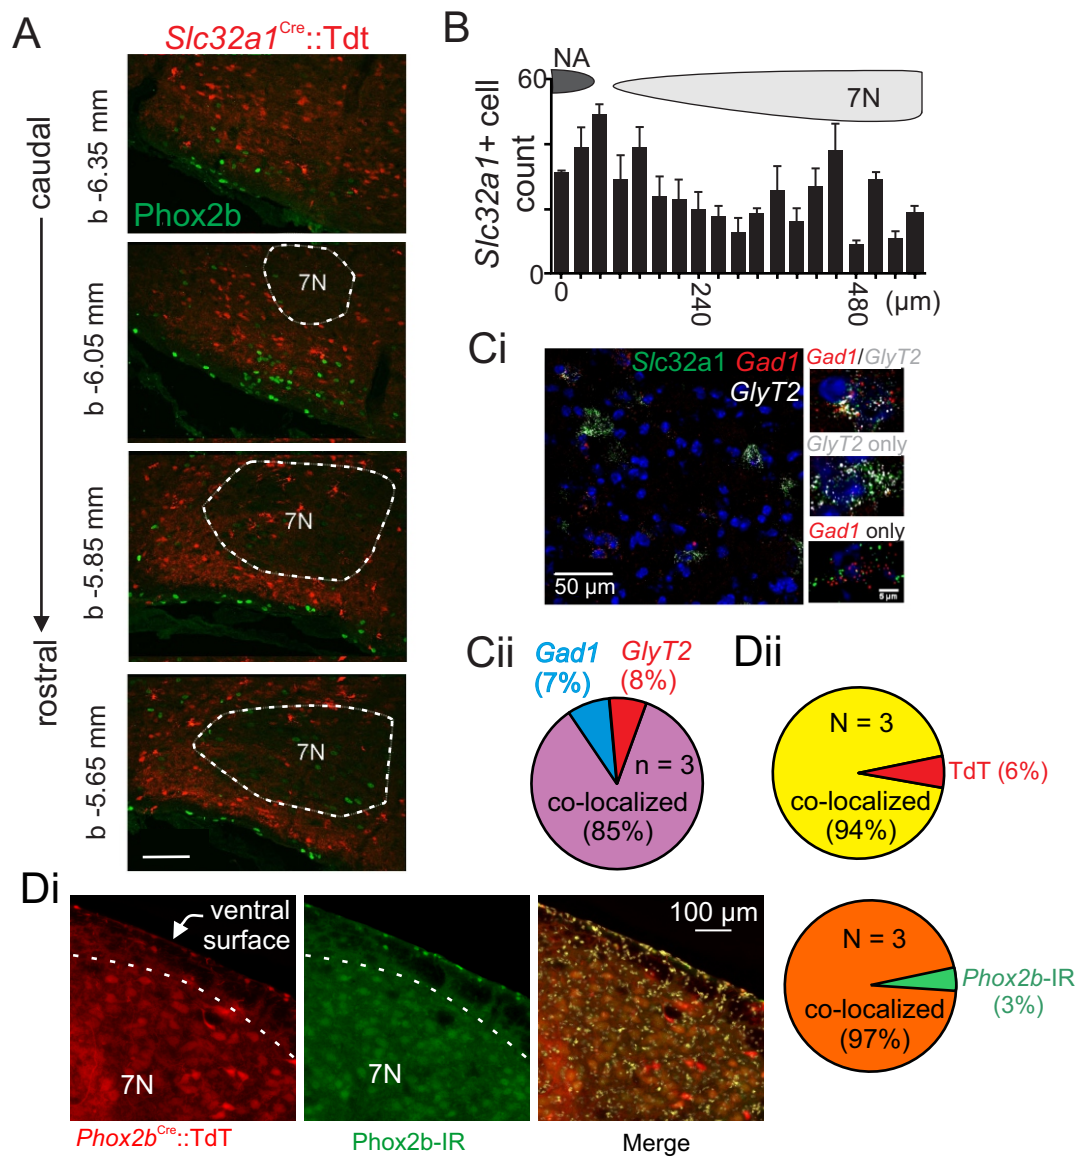

Figure 1- figure supplement 2

Supplement: supp [file elife_poa_e60317_Figure_1_figure_supplement_2.pdf › elife_poa_e60317_Figure_1_figure_supplement_2.pdf]

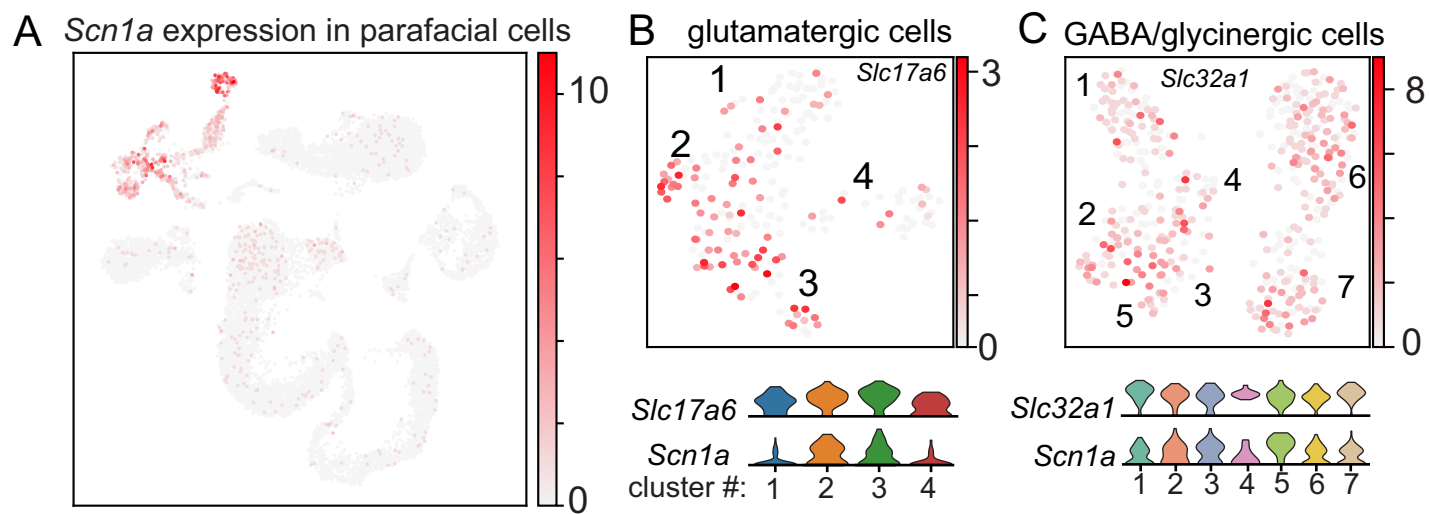

Figure 1- figure supplement 3

Supplement: supp [file elife_poa_e60317_Figure_1_figure_supplement_3.pdf › elife_poa_e60317_Figure_1_figure_supplement_3.pdf]

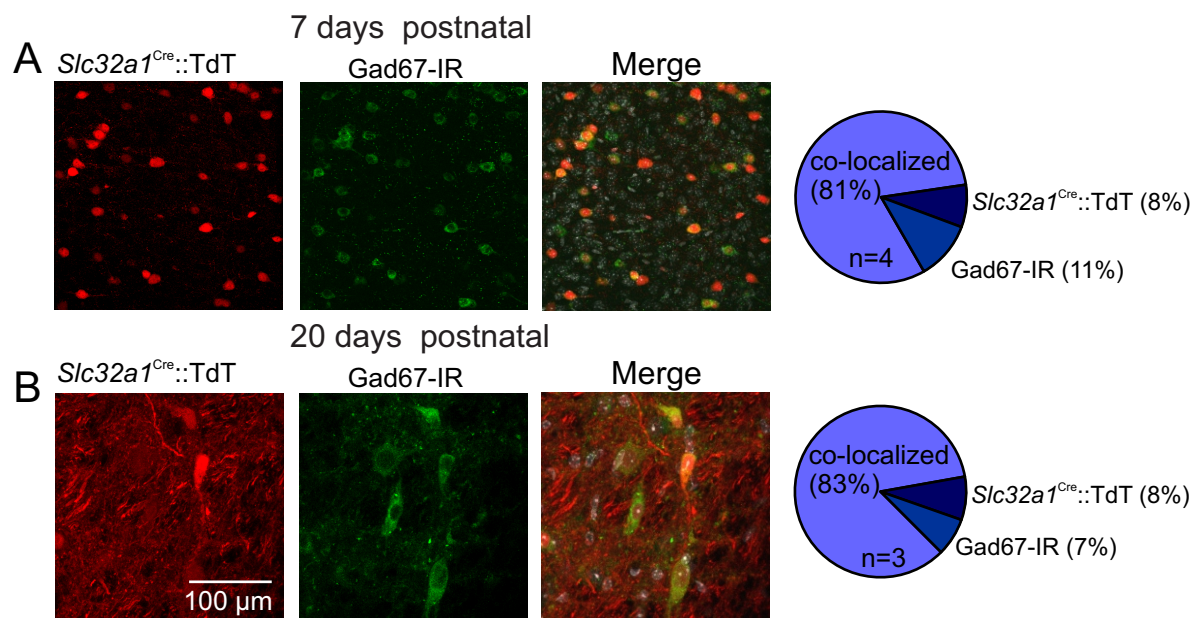

Figure 2-figure supplement 1

Supplement: supp [file elife_poa_e60317_Figure_2_figure_supplement_1.pdf › elife_poa_e60317_Figure_2_figure_supplement_1.pdf]

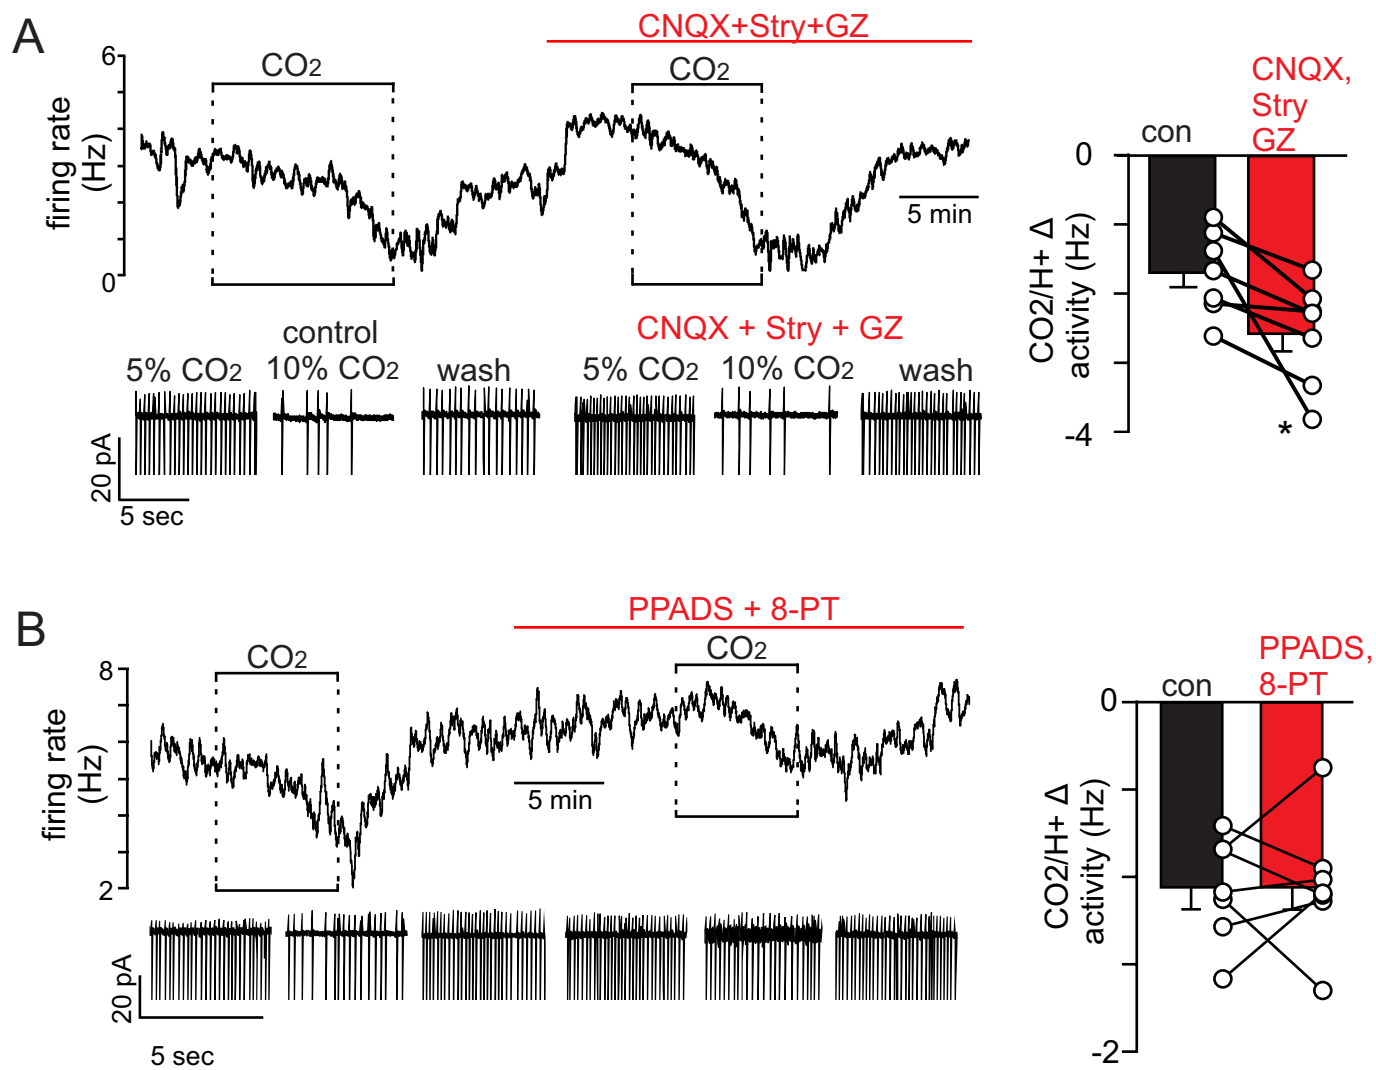

figure 2- figure supplement 2

Supplement: supp [file elife_poa_e60317_Figure_2_figure_supplement_2.pdf › elife_poa_e60317_Figure_2_figure_supplement_2.pdf]

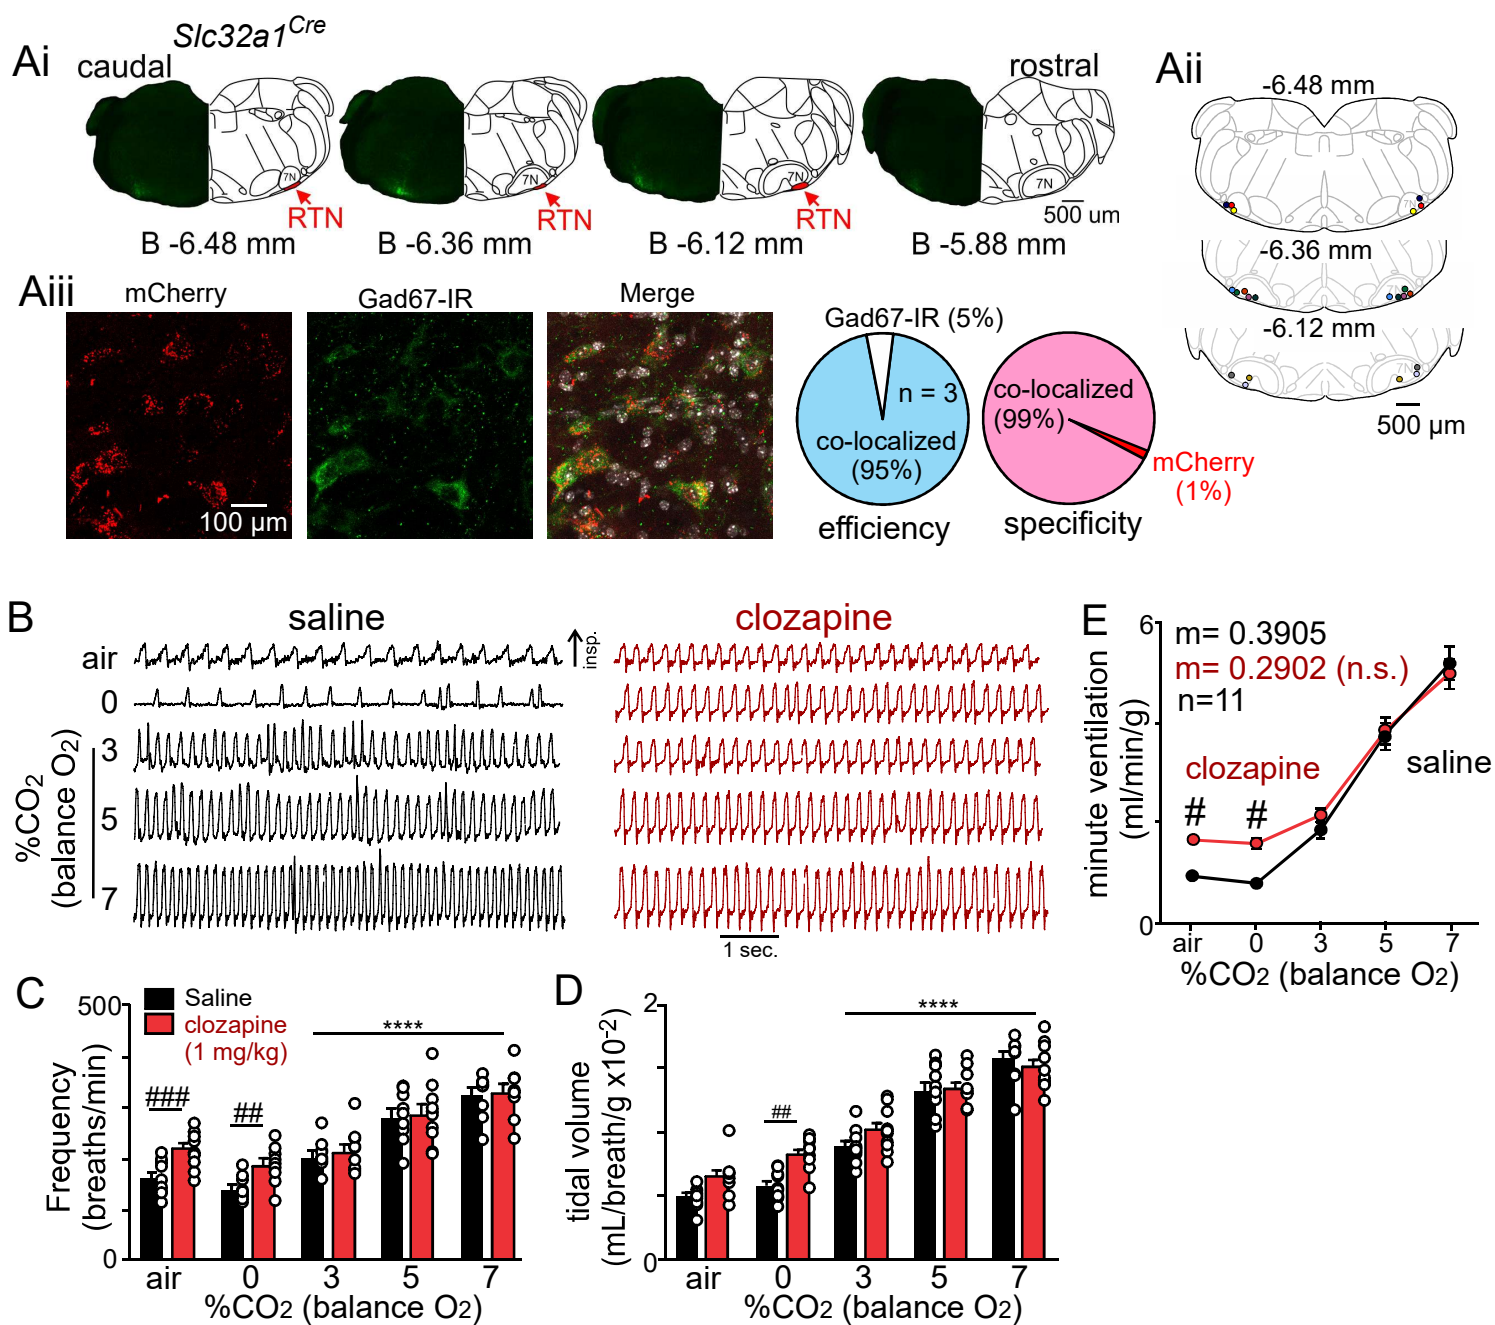

Figure 5-figure supplement 1

Supplement: supp [file elife_poa_e60317_Figure_5_figure_supplement_1.pdf › elife_poa_e60317_Figure_5_figure_supplement_1.pdf]

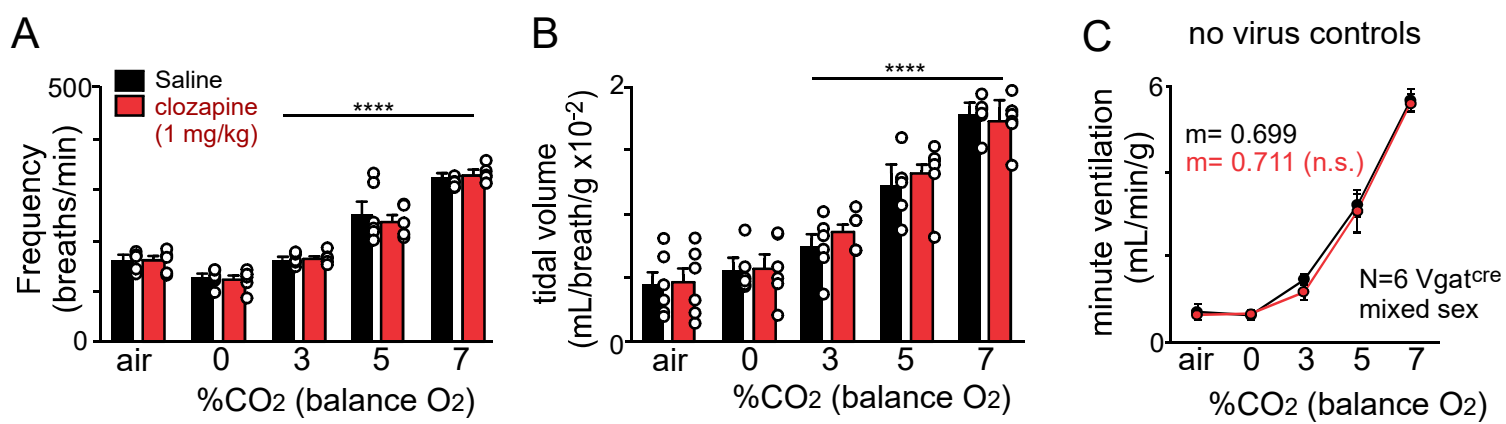

Figure 5- figure supplement 2

Supplement: supp [file elife_poa_e60317_Figure_5_figure_supplement_2.pdf › elife_poa_e60317_Figure_5_figure_supplement_2.pdf]
